# Supplementary material for: Structural tailoring of nanoporous anodic alumina optical microcavities for enhanced resonant recirculation of light
Source: Royal Society of Chemistry journal article supplement (doi:10.1039/c8nr04263b), 2018-01-01
Supplement: c8nr04263b1.pdf [file c8nr04263b1.pdf]

# Supporting Information

## Structural Tailoring of Nanoporous Anodic Alumina Optical Microcavities for Enhanced Resonant Recirculation of Light

Cheryl Suwen Law<sup>a,b,c</sup>, Siew Yee Lim<sup>a,b,c</sup>, Andrew D. Abell<sup>\*b,c,d</sup>, Lluís F. Marsal<sup>\*e</sup>,  
and Abel Santos<sup>\*a,b,c</sup>

<sup>a</sup>School of Chemical Engineering, The University of Adelaide, Adelaide, SA 5005, Australia

<sup>b</sup>Institute for Photonics and Advanced Sensing (IPAS), The University of Adelaide, 5005 Adelaide, Australia

<sup>c</sup>ARC Centre of Excellence for Nanoscale BioPhotonics (CNBP), The University of Adelaide, 5005 Adelaide, Australia

<sup>d</sup>Department of Chemistry, The University of Adelaide, Engineering North Building, 5005 Adelaide, Australia.

<sup>e</sup>Department of Electronic, Electric, and Automatics Engineering, Universitat Rovira i Virgili, 43007 Tarragona, Spain

**\*E-Mails:** [andrew.abell@adelaide.edu.au](mailto:andrew.abell@adelaide.edu.au) ; [lluis.marsal@urv.cat](mailto:lluis.marsal@urv.cat) ; [abel.santos@adelaide.edu.au](mailto:abel.santos@adelaide.edu.au)

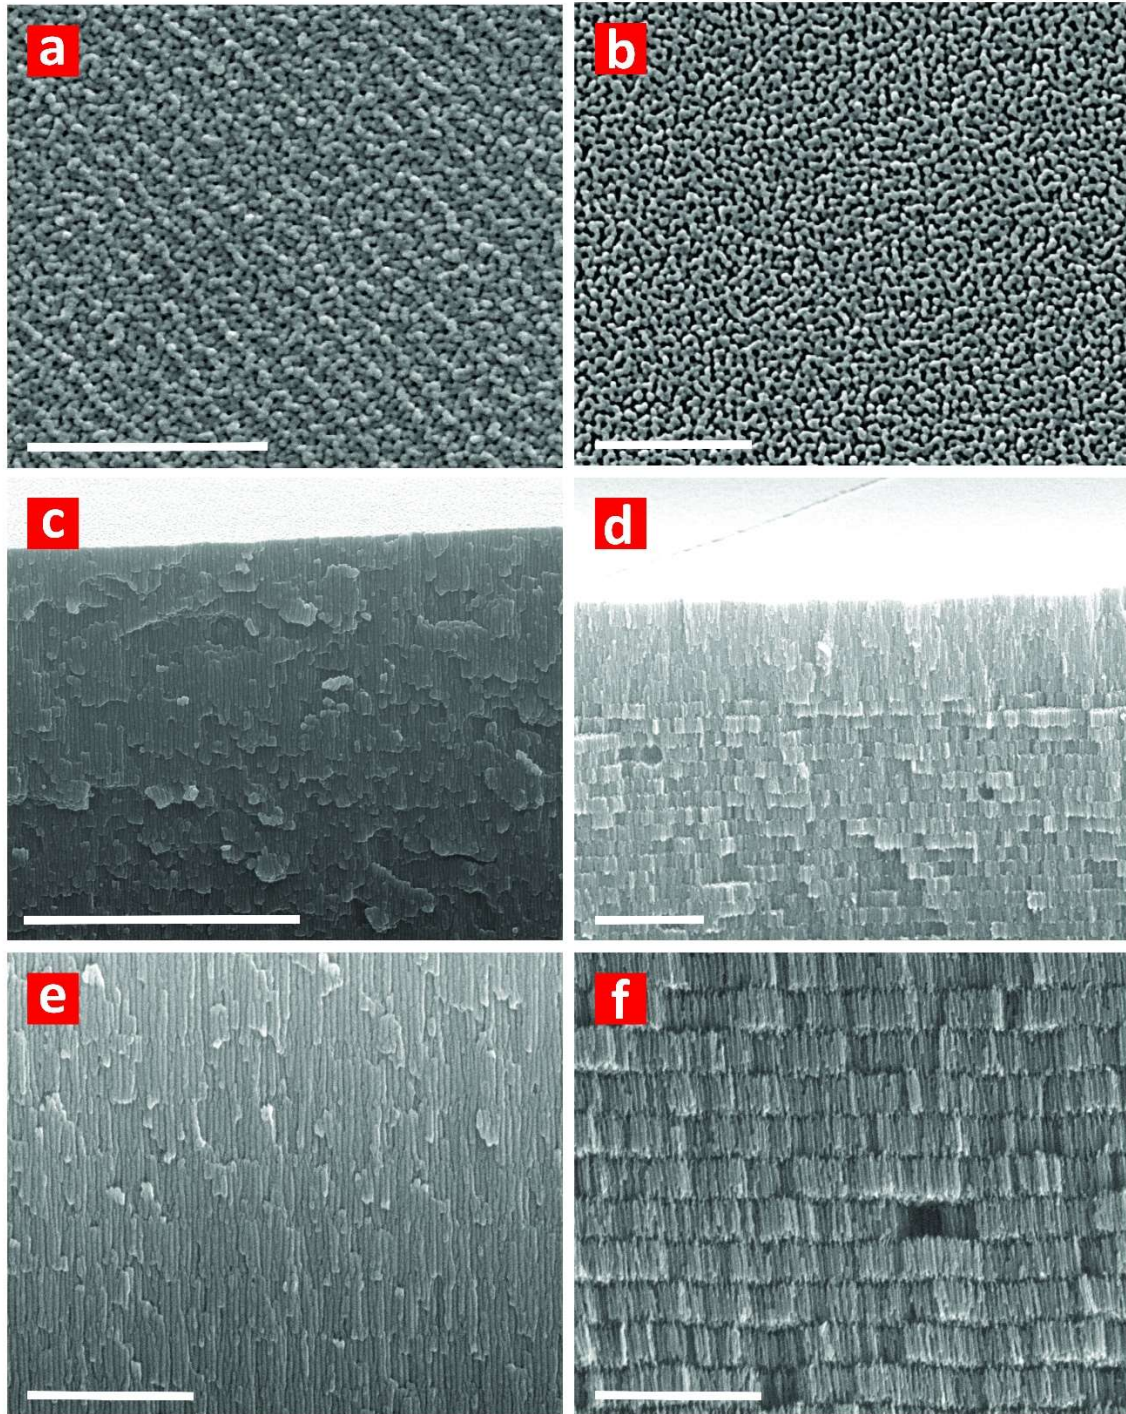

**Figure S1.** Effect of pore widening time on the structure of NAA- $\mu$ CVs. a and b) Representative top view FEG-SEM images of a GIF-NAA- $\mu$ CV at  $t_{pw} = 0$  and 6 min, respectively (scale bars = 500 nm). c and d) General cross-sectional view FEG-SEM images of a GIF-NAA- $\mu$ CV at  $t_{pw} = 0$  and 6 min (scale bars = 2  $\mu$ m). e and f) Magnified cross-sectional view FEG-SEM images showing details of the porosity contrast between layers in a GIF-NAA- $\mu$ CV at  $t_{pw} = 0$  and 6 min, respectively (scale bars = 5  $\mu$ m).



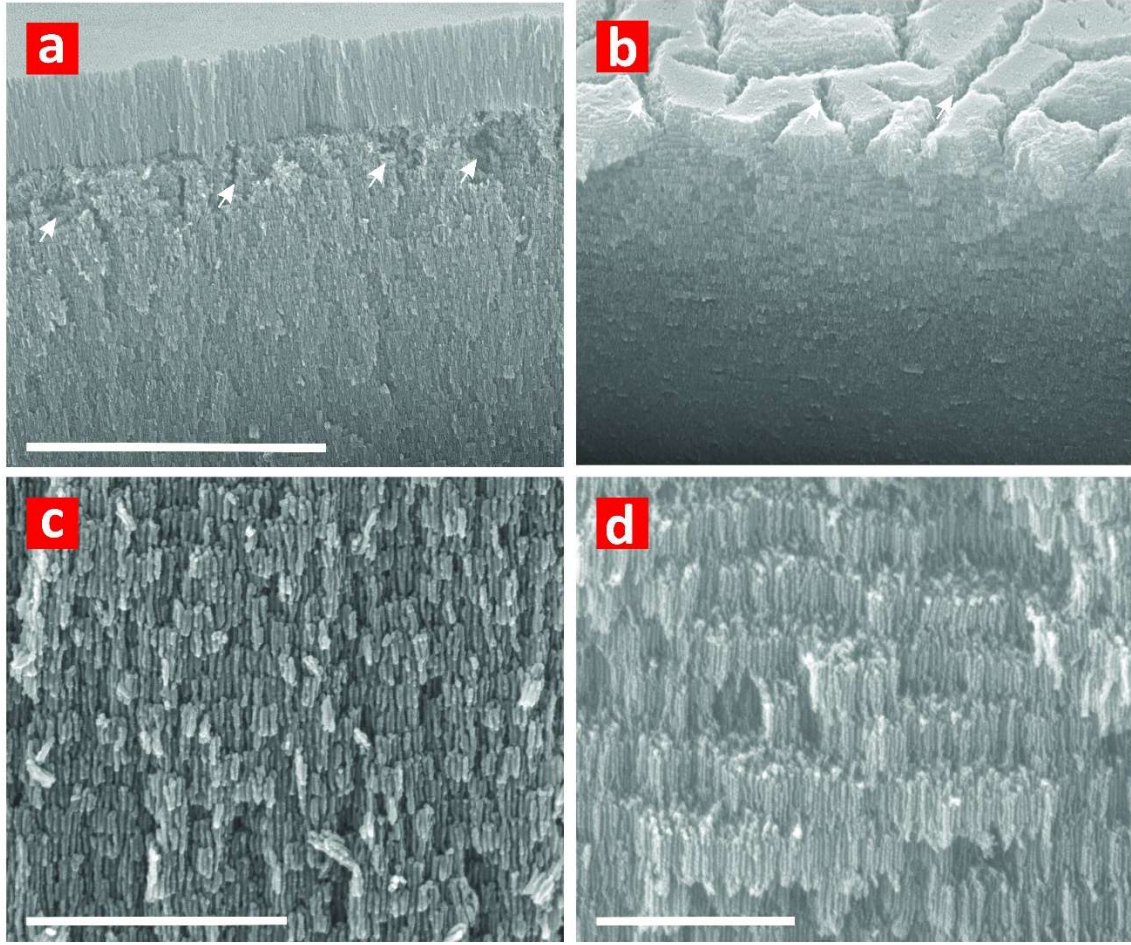

**Figure S2.** Effect of excessive pore widening time on the structure of NAA- $\mu$ CVs. a and b) Representative general cross-sectional view FEG-SEM images of a GIF-NAA- $\mu$ CV at  $t_{pw} = 6$  and 8 min, respectively (scale bars = 5  $\mu$ m) (note: white arrows indicate regions that partially collapse due to excessive pore widening treatment). c and d) Magnified cross-sectional view FEG-SEM images showing details of the porosity between layers in a GIF-NAA- $\mu$ CV at  $t_{pw} = 6$  and 8 min, respectively (scale bars = 1  $\mu$ m).

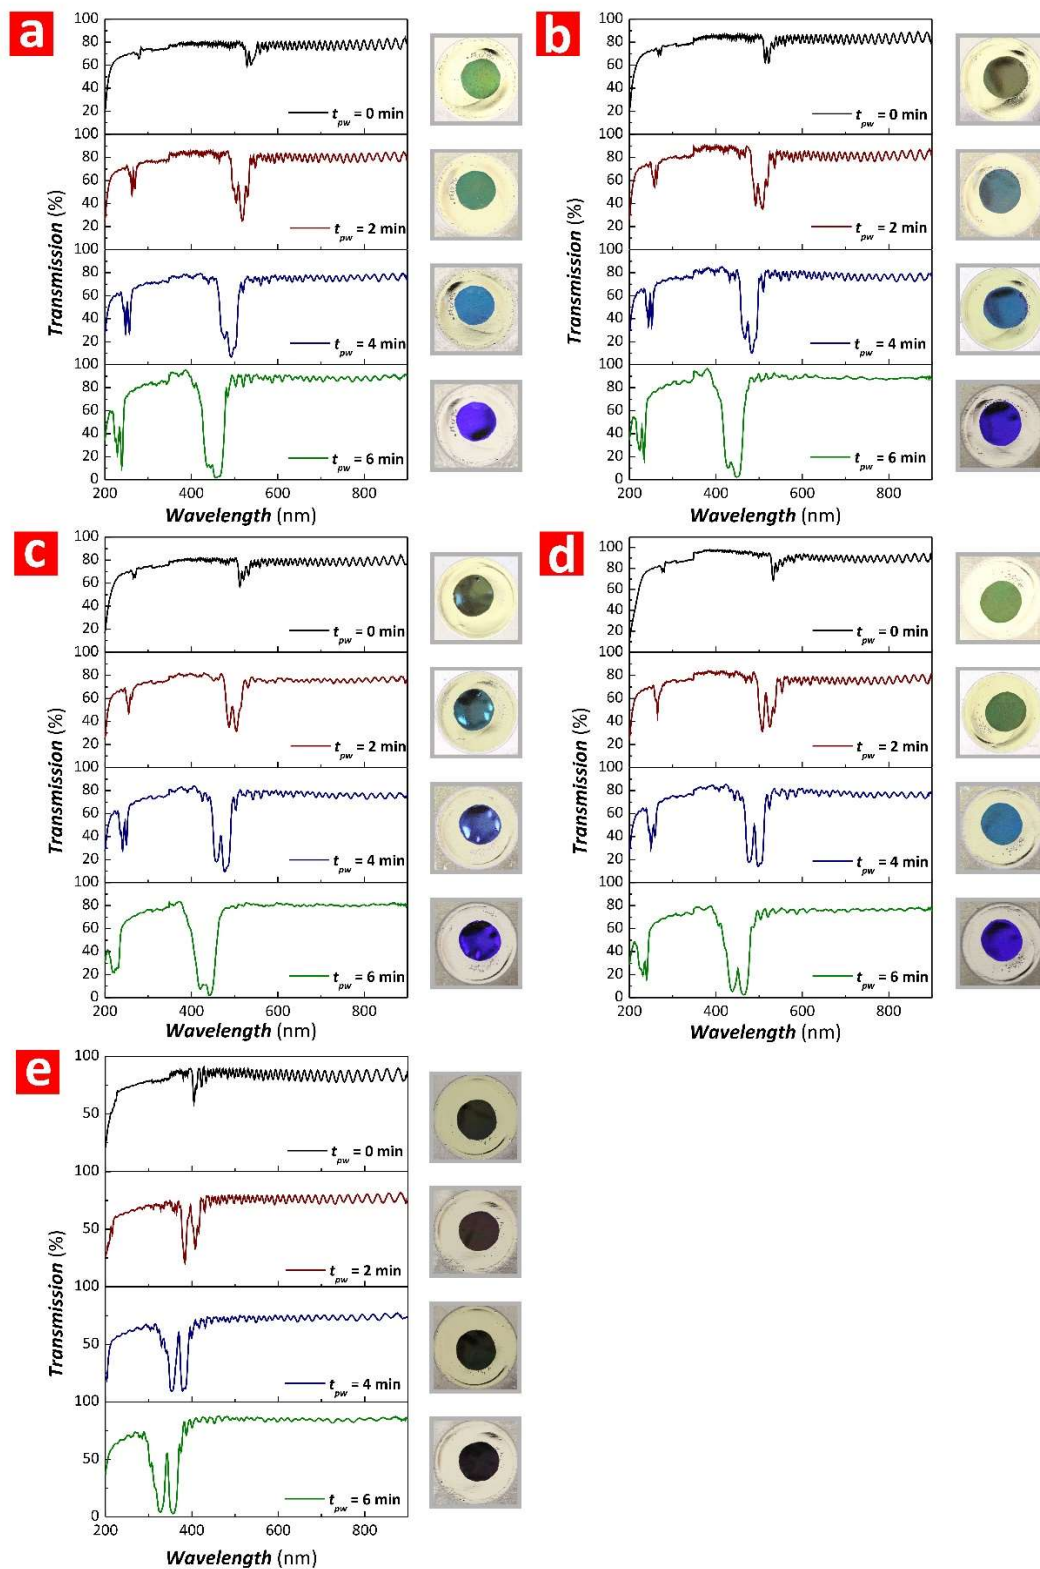

**Figure S3.** Representative transmission spectra for GIF-NAA- $\mu$ CVs produced by SPA at  $t_c = 4.5$  min and variable  $J_C$  and  $t_{pw}$  (note:  $T_P = 600$  s,  $A_J = 0.420$  mA cm $^{-2}$ ,  $J_{offset} = 0.280$  mA cm $^{-2}$ , and  $N_P = 30$  pulses). a)  $J_C = 0.210$  mA cm $^{-2}$ . b)  $J_C = 0.420$  mA cm $^{-2}$ . c)  $J_C = 0.315$  mA cm $^{-2}$ . d)  $J_C = 0.525$  mA cm $^{-2}$ . e)  $J_C = 0.630$  mA cm $^{-2}$ .

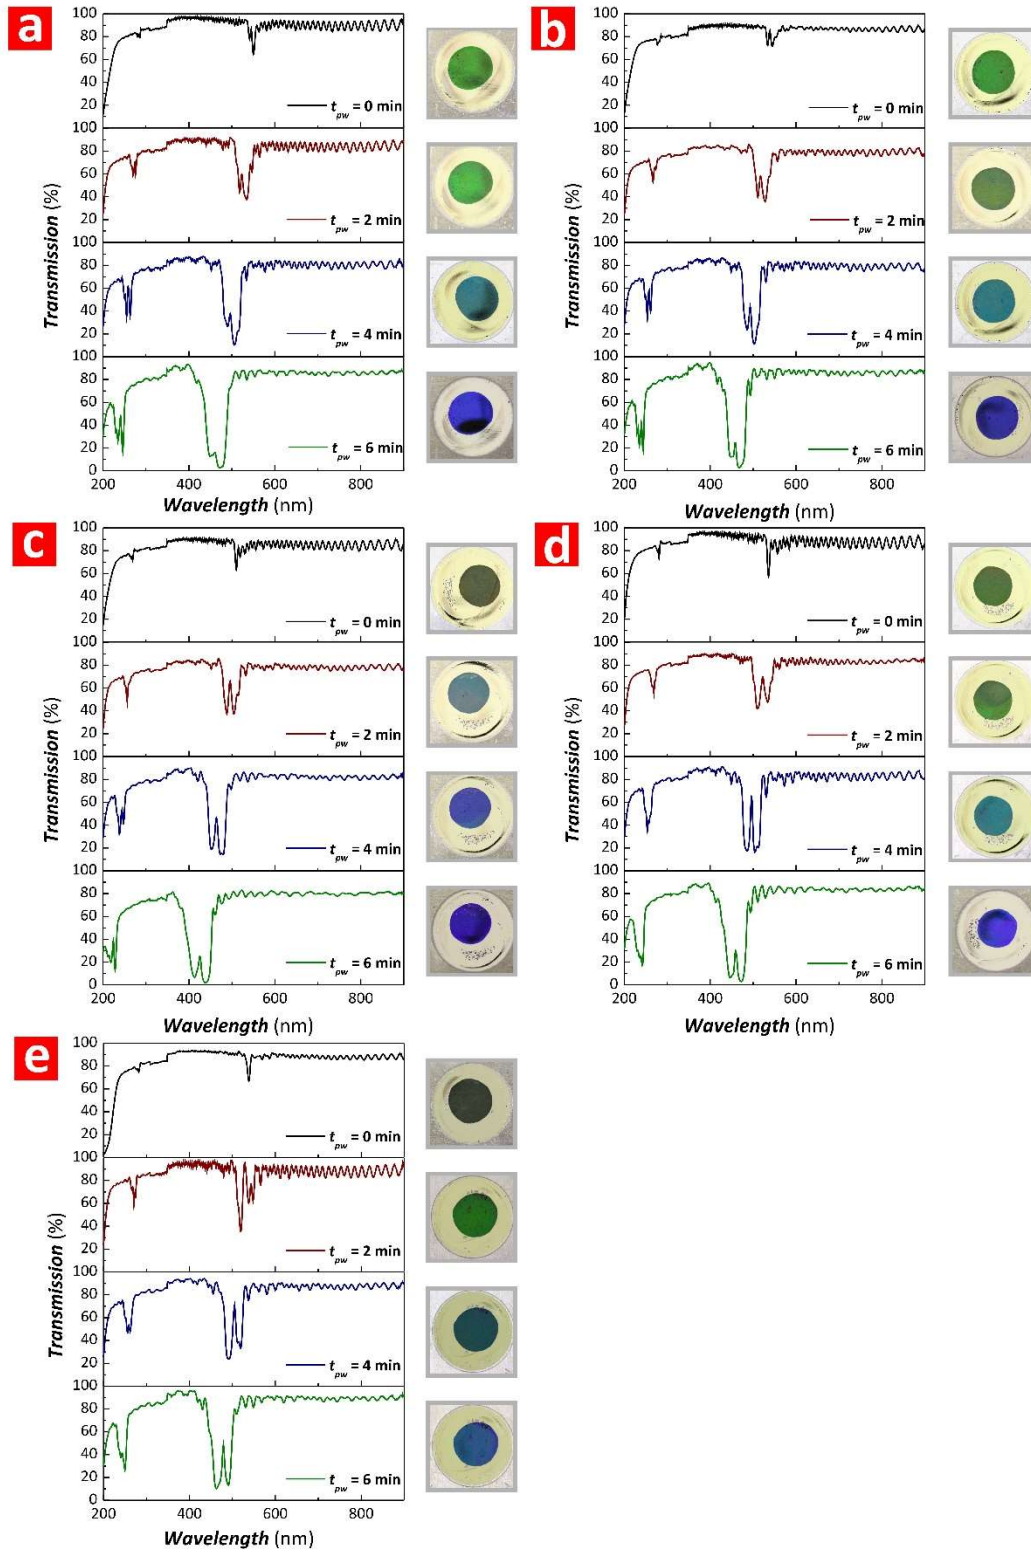

**Figure S4.** Representative transmission spectra for GIF-NAA- $\mu$ CVs produced by SPA at  $t_c = 5.5$  min and variable  $J_C$  and  $t_{pw}$  (note:  $T_P = 600$  s,  $A_J = 0.420$  mA cm $^{-2}$ ,  $J_{Offset} = 0.280$  mA cm $^{-2}$ , and  $N_P = 30$  pulses). a)  $J_C = 0.210$  mA cm $^{-2}$ . b)  $J_C = 0.420$  mA cm $^{-2}$ . c)  $J_C = 0.315$  mA cm $^{-2}$ . d)  $J_C = 0.525$  mA cm $^{-2}$ . e)  $J_C = 0.630$  mA cm $^{-2}$ .



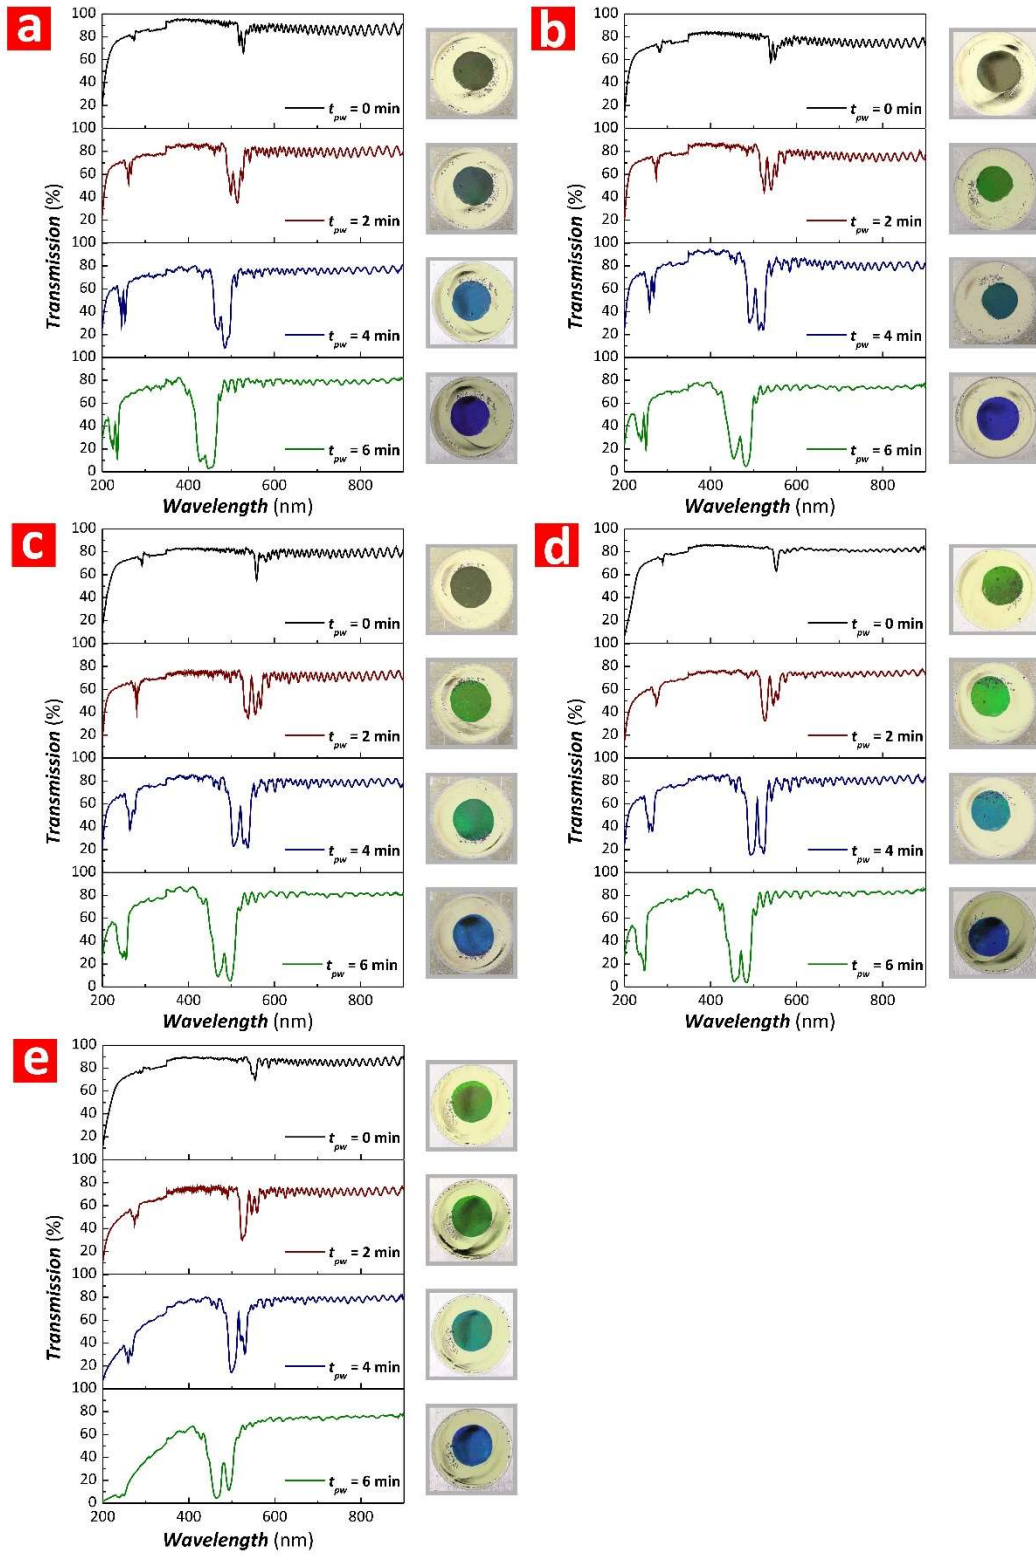

**Figure S5.** Representative transmission spectra for GIF-NAA- $\mu$ CVs produced by SPA at  $t_c = 6.5$  min and variable  $J_c$  and  $t_{pw}$  (note:  $T_P = 600$  s,  $A_I = 0.420$  mA cm $^{-2}$ ,  $J_{offset} = 0.280$  mA cm $^{-2}$ , and  $N_P = 30$  pulses). a)  $J_c = 0.210$  mA cm $^{-2}$ . b)  $J_c = 0.420$  mA cm $^{-2}$ . c)  $J_c = 0.315$  mA cm $^{-2}$ . d)  $J_c = 0.525$  mA cm $^{-2}$ . e)  $J_c = 0.630$  mA cm $^{-2}$ .

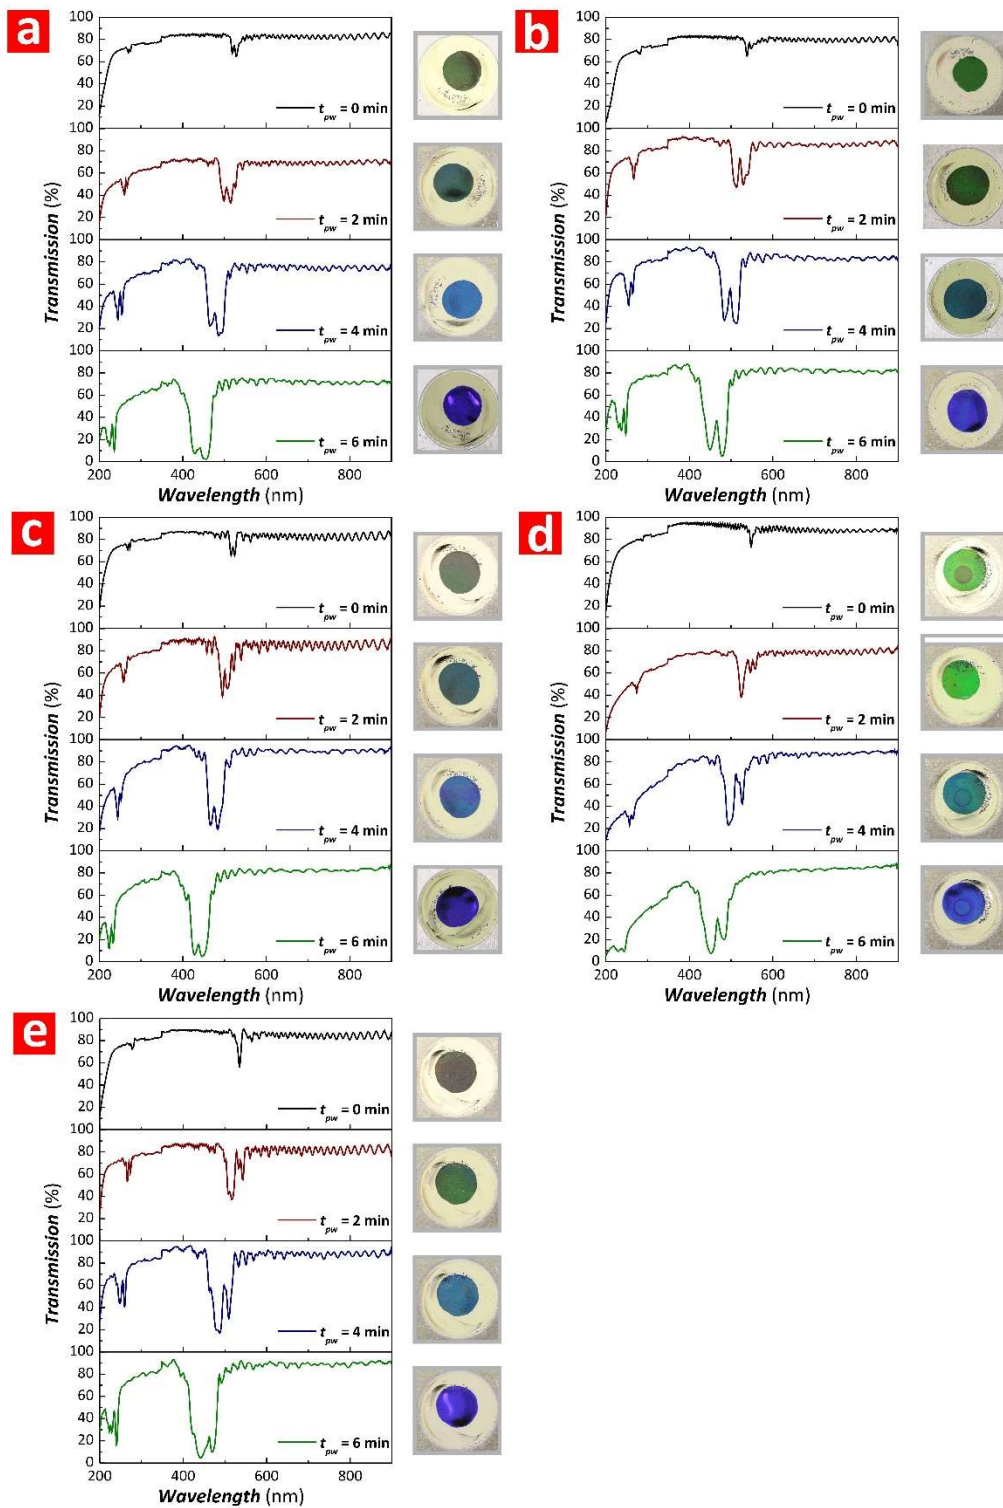

**Figure S6.** Representative transmission spectra for GIF-NAA- $\mu$ CVs produced by SPA at  $t_C = 7.5$  min and variable  $J_C$  and  $t_{PW}$  (note:  $T_P = 600$  s,  $A_J = 0.420$  mA cm $^{-2}$ ,  $J_{Offset} = 0.280$  mA cm $^{-2}$ , and  $N_P = 30$  pulses). a)  $J_C = 0.210$  mA cm $^{-2}$ . b)  $J_C = 0.420$  mA cm $^{-2}$ . c)  $J_C = 0.315$  mA cm $^{-2}$ . d)  $J_C = 0.525$  mA cm $^{-2}$ . e)  $J_C = 0.630$  mA cm $^{-2}$ .

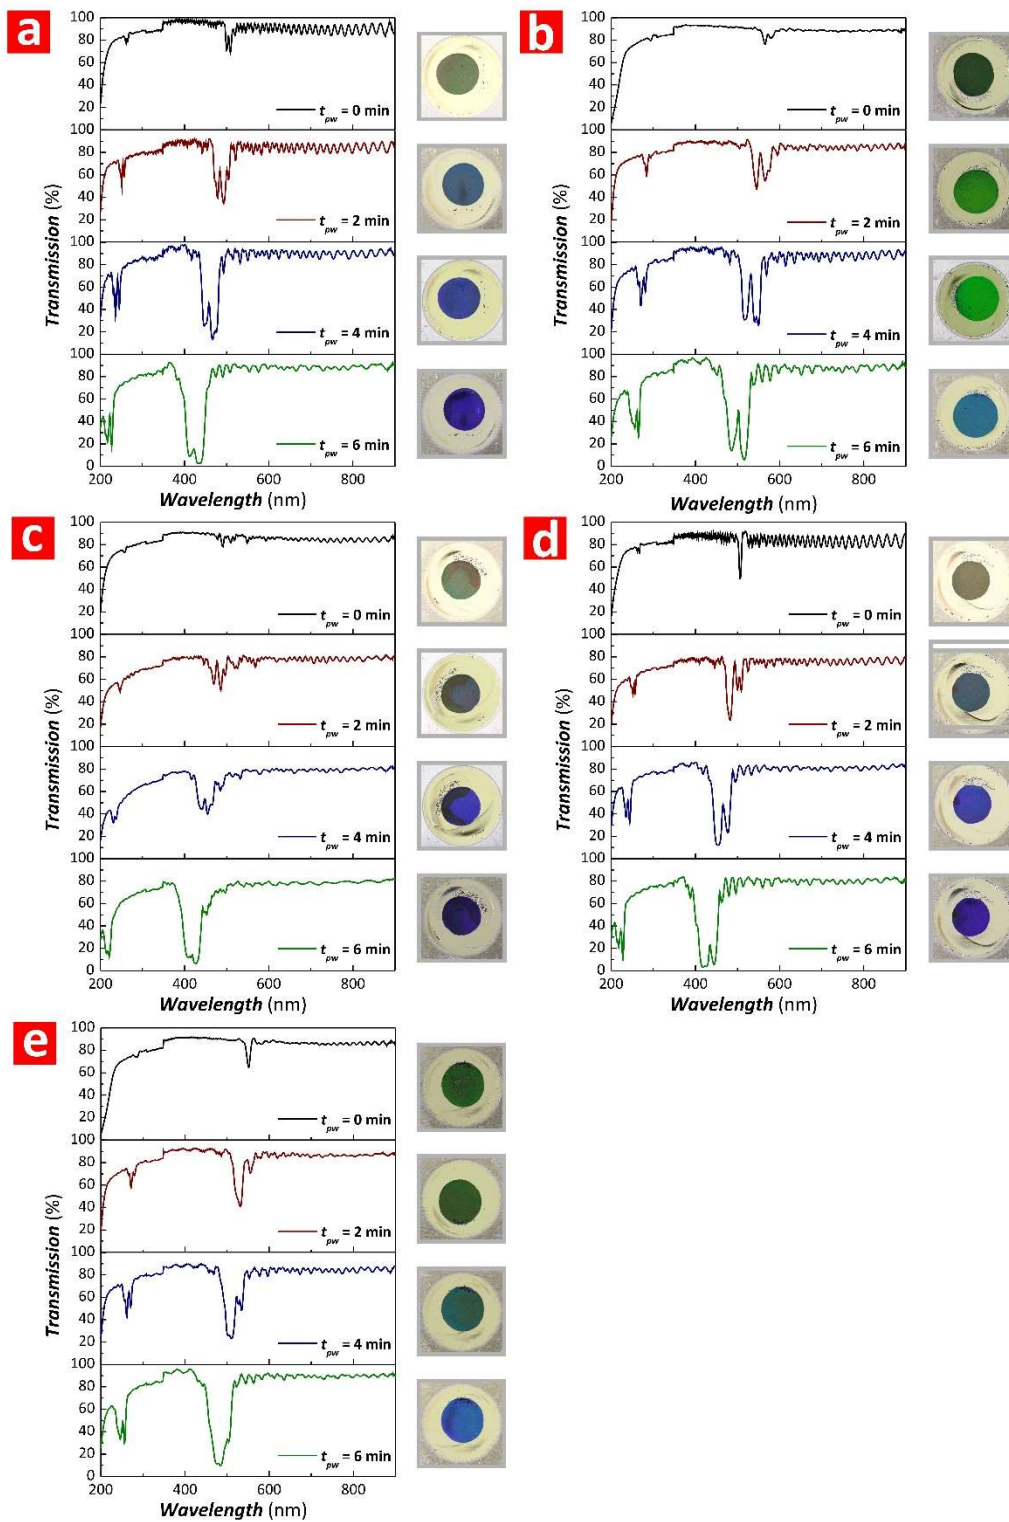

**Figure S7.** Representative transmission spectra for GIF-NAA- $\mu$ CVs produced by SPA at  $t_C = 8.5$  min and variable  $J_C$  and  $t_{PW}$  (note:  $T_P = 600$  s,  $A_J = 0.420$  mA cm $^{-2}$ ,  $J_{Offset} = 0.280$  mA cm $^{-2}$ , and  $N_P = 30$  pulses). a)  $J_C = 0.210$  mA cm $^{-2}$ . b)  $J_C = 0.420$  mA cm $^{-2}$ . c)  $J_C = 0.315$  mA cm $^{-2}$ . d)  $J_C = 0.525$  mA cm $^{-2}$ . e)  $J_C = 0.630$  mA cm $^{-2}$ .



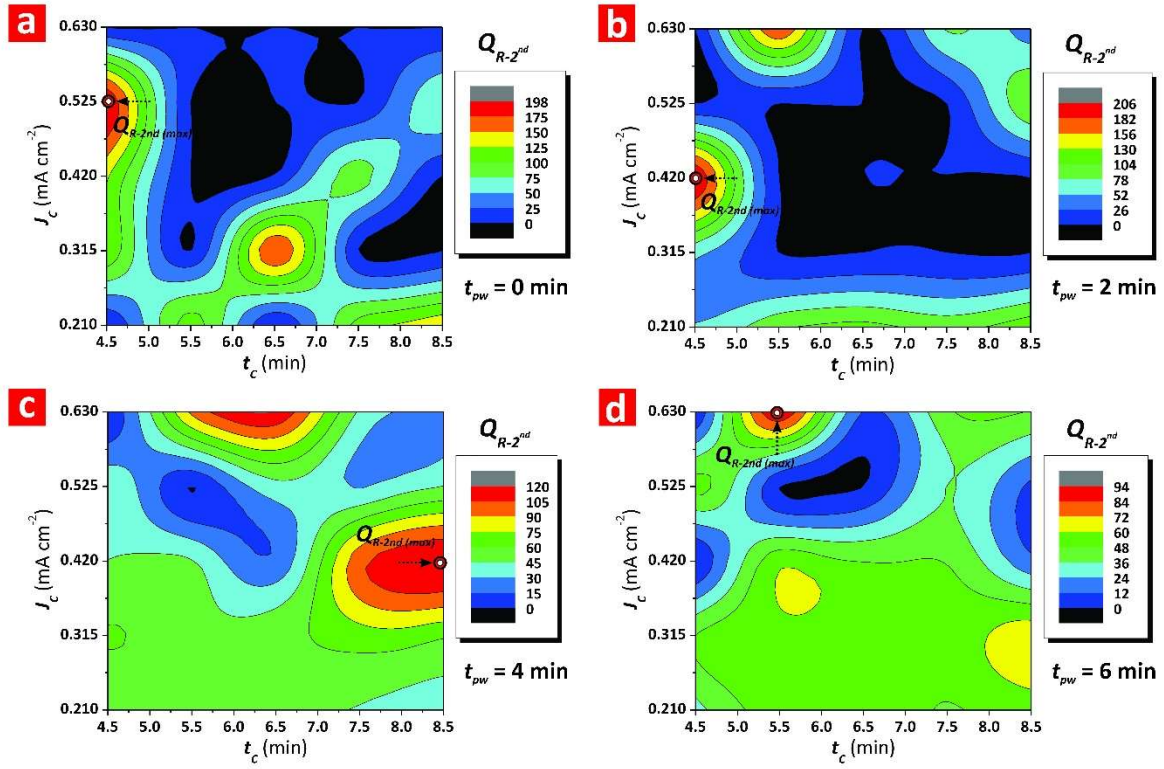

**Figure S8.** Contour maps showing the combined effect of cavity fabrication parameters (i.e. anodisation time –  $t_c$  and current density –  $J_c$ ) on the quality factor of the second order resonance band ( $Q_{R-2nd}$ ) of GIF-NAA- $\mu$ CVs produced by SPA at different pore widening times ( $t_{pw}$ ). a)  $t_{pw} = 0$  min. b)  $t_{pw} = 2$  min. c)  $t_{pw} = 4$  min. c)  $t_{pw} = 6$  min. (note: GIF-NAA- $\mu$ CVs produced with  $T_P = 600$  s,  $A_J = 0.420$  mA cm<sup>-2</sup>,  $J_{Offset} = 0.280$  mA cm<sup>-2</sup>, and  $N_P = 30$  pulses).

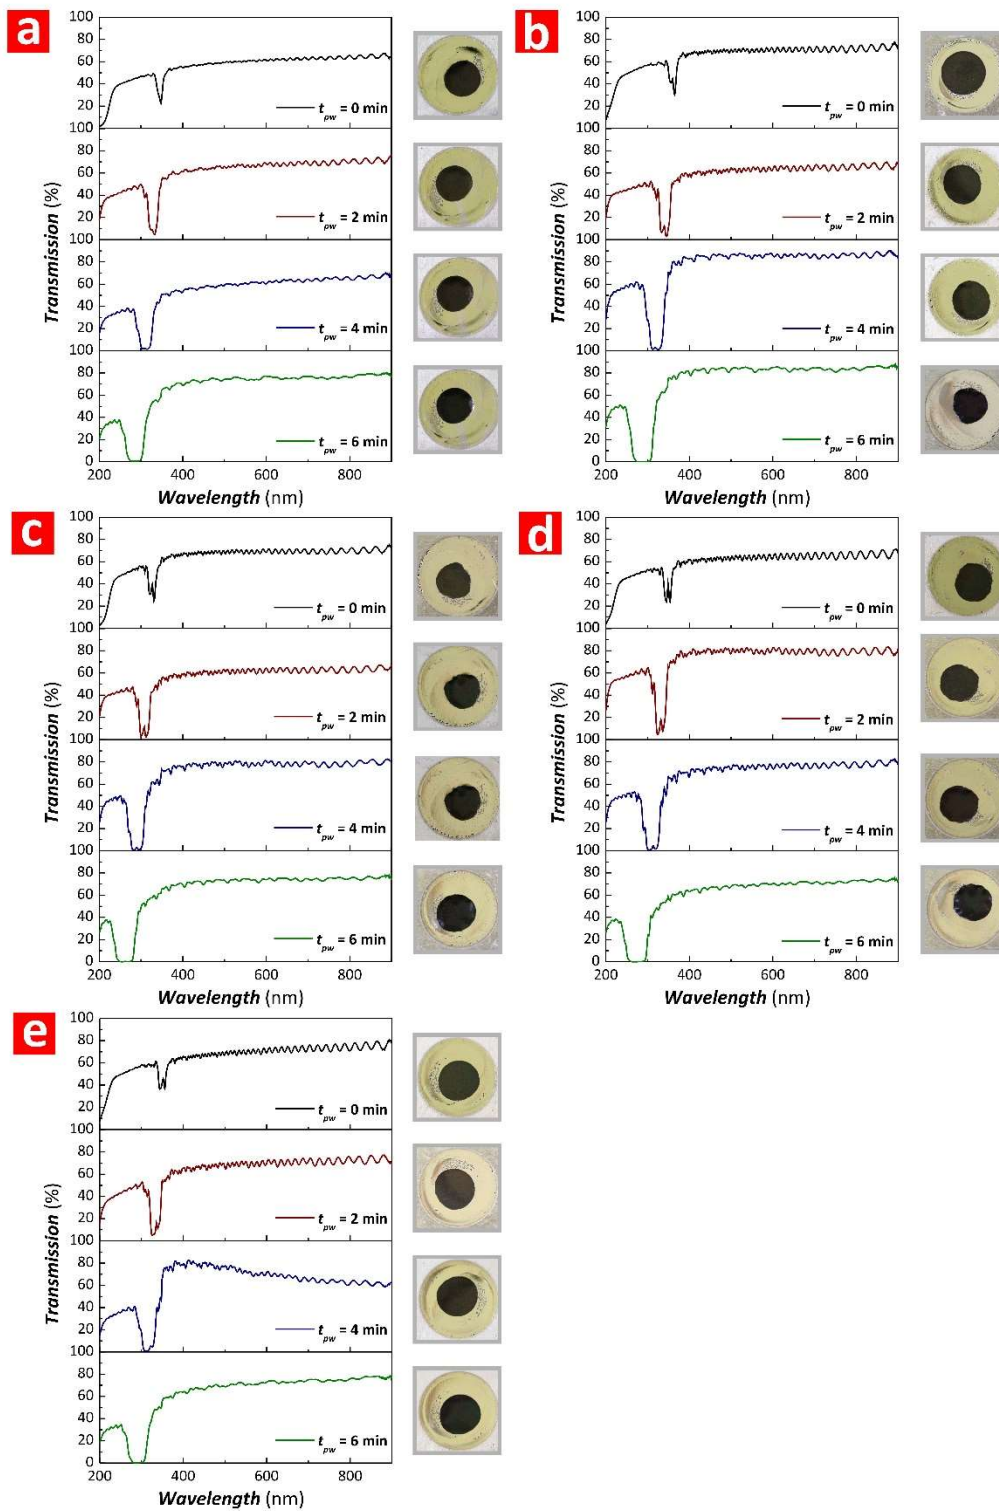

**Figure S9.** Representative transmission spectra for DBR-NAA- $\mu$ CVs produced by STPA at  $t_c = 4.5$  min and variable  $J_c$  and  $t_{pw}$  (note:  $T_P = 600$  s,  $A_J = 0.420$  mA cm $^{-2}$ ,  $J_{offset} = 0.280$  mA cm $^{-2}$ , and  $N_P = 30$  pulses). a)  $J_c = 0.210$  mA cm $^{-2}$ . b)  $J_c = 0.420$  mA cm $^{-2}$ . c)  $J_c = 0.315$  mA cm $^{-2}$ . d)  $J_c = 0.525$  mA cm $^{-2}$ . e)  $J_c = 0.630$  mA cm $^{-2}$ .

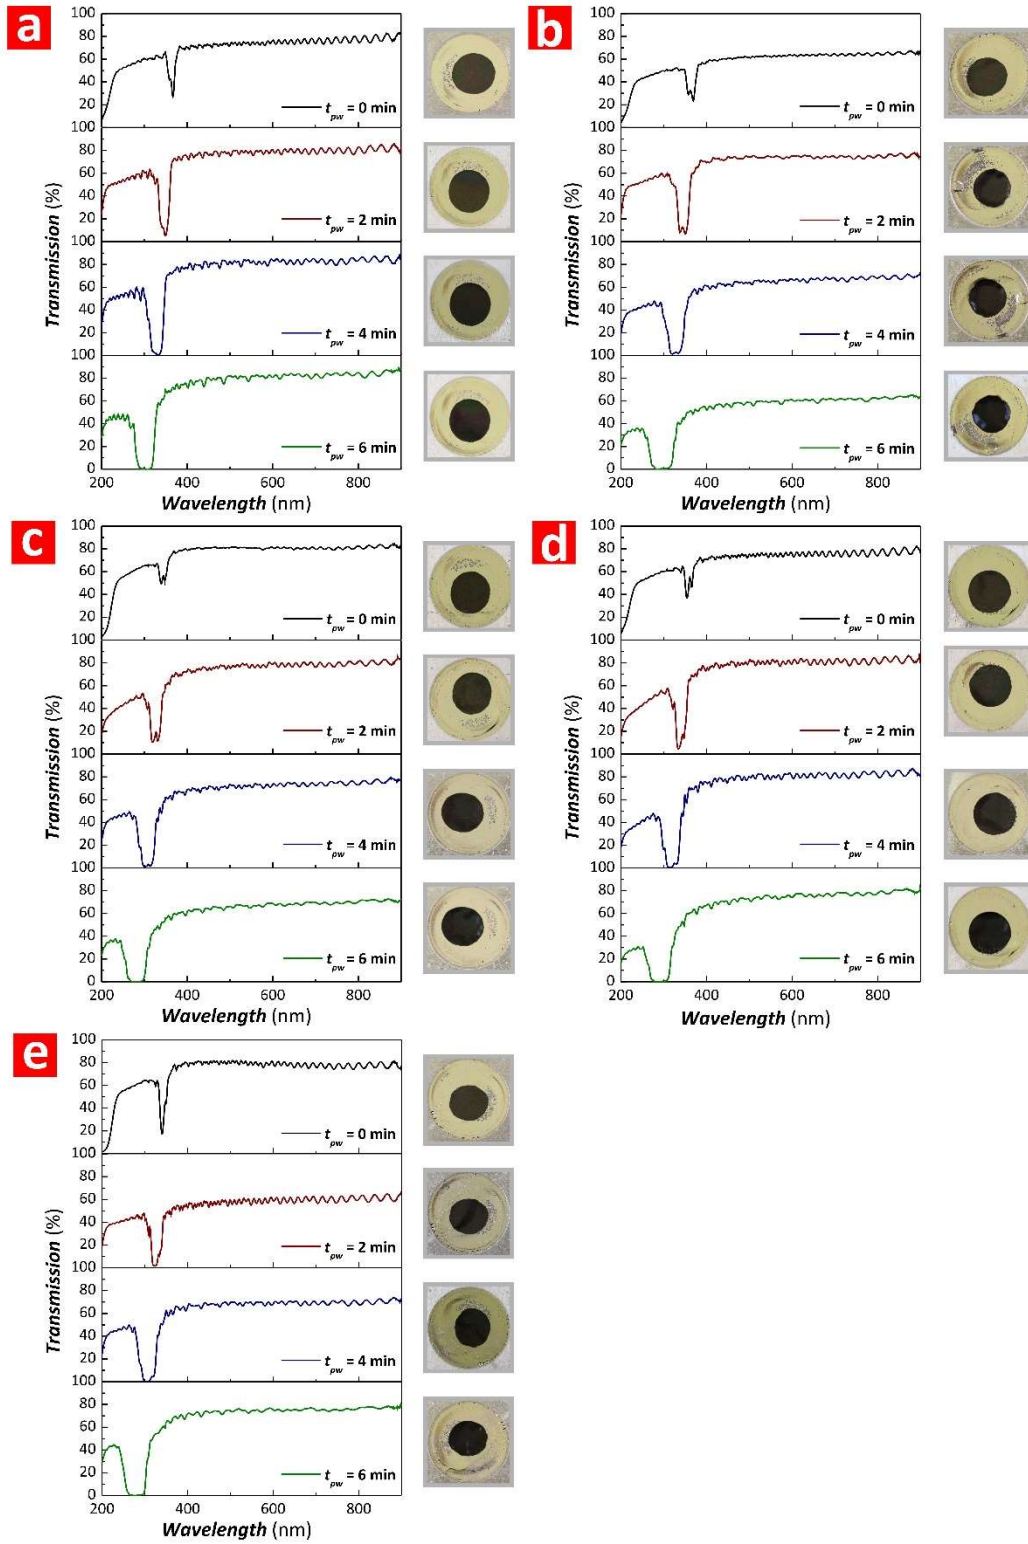

**Figure S10.** Representative transmission spectra for DBR-NAA- $\mu$ CVs produced by STPA at  $t_c = 5.5$  min and variable  $J_C$  and  $t_{pw}$  (note:  $T_P = 600$  s,  $A_J = 0.420$  mA cm $^{-2}$ ,  $J_{offset} = 0.280$  mA cm $^{-2}$ , and  $N_P = 30$  pulses). a)  $J_C = 0.210$  mA cm $^{-2}$ . b)  $J_C = 0.420$  mA cm $^{-2}$ . c)  $J_C = 0.315$  mA cm $^{-2}$ . d)  $J_C = 0.525$  mA cm $^{-2}$ . e)  $J_C = 0.630$  mA cm $^{-2}$ .



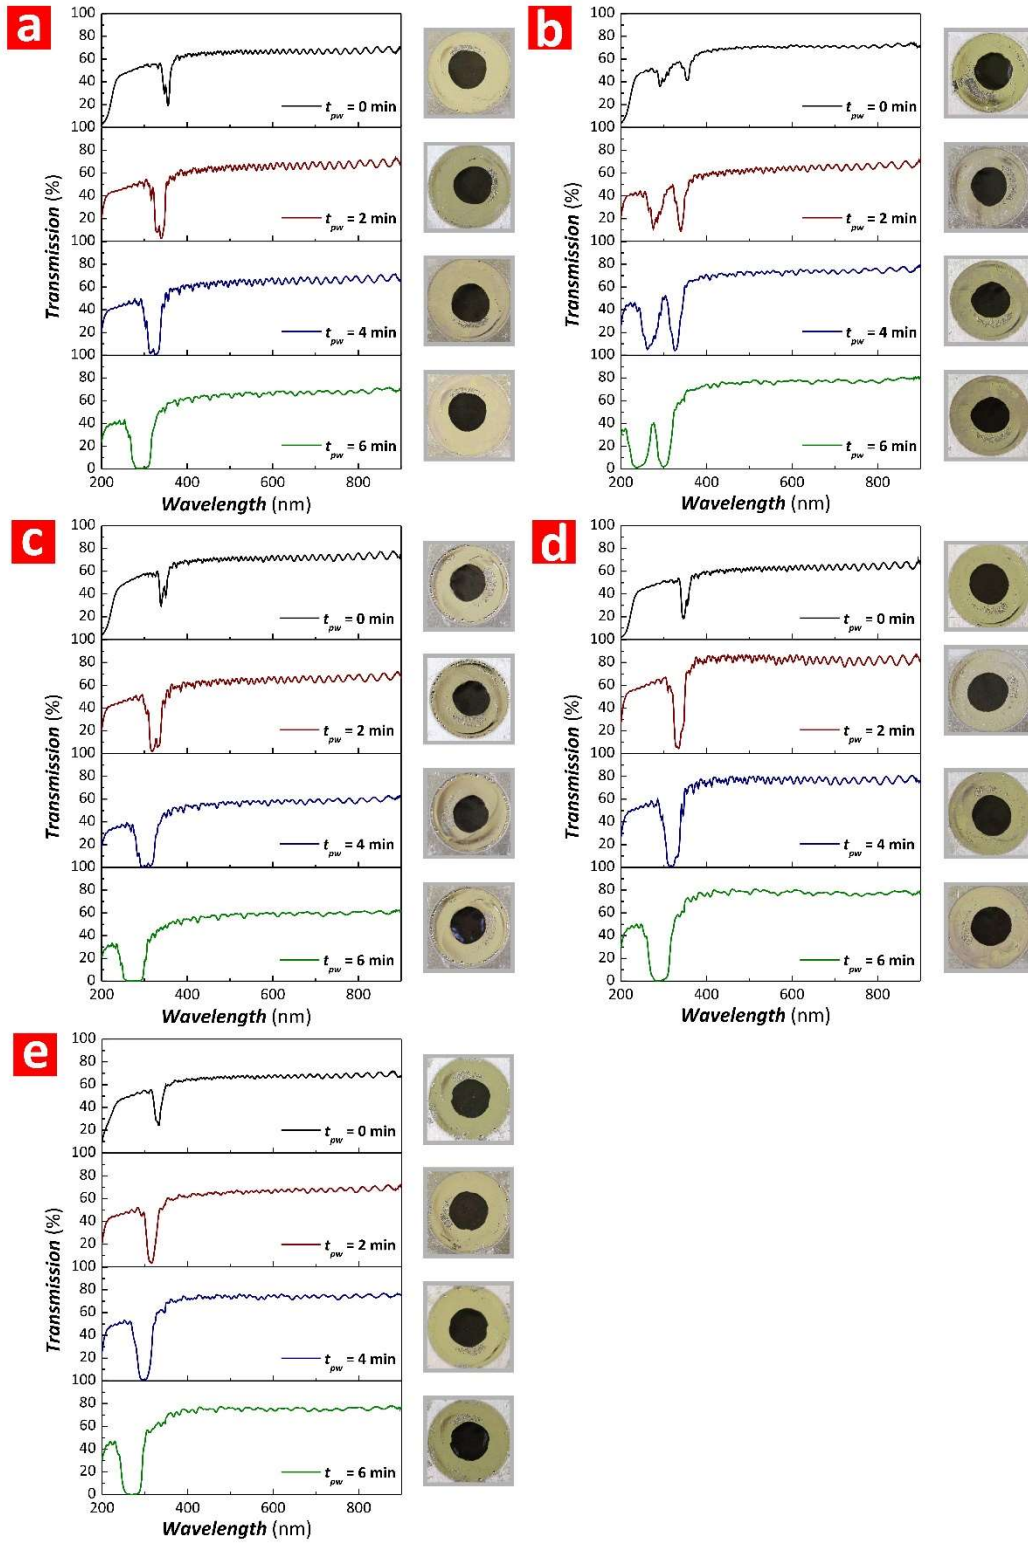

**Figure S11.** Representative transmission spectra for DBR-NAA- $\mu$ CVs produced by STPA at  $t_c = 6.5$  min and variable  $J_C$  and  $t_{pw}$  (note:  $T_P = 600$  s,  $A_J = 0.420$  mA cm $^{-2}$ ,  $J_{Offset} = 0.280$  mA cm $^{-2}$ , and  $N_P = 30$  pulses). a)  $J_C = 0.210$  mA cm $^{-2}$ . b)  $J_C = 0.420$  mA cm $^{-2}$ . c)  $J_C = 0.315$  mA cm $^{-2}$ . d)  $J_C = 0.525$  mA cm $^{-2}$ . e)  $J_C = 0.630$  mA cm $^{-2}$ .

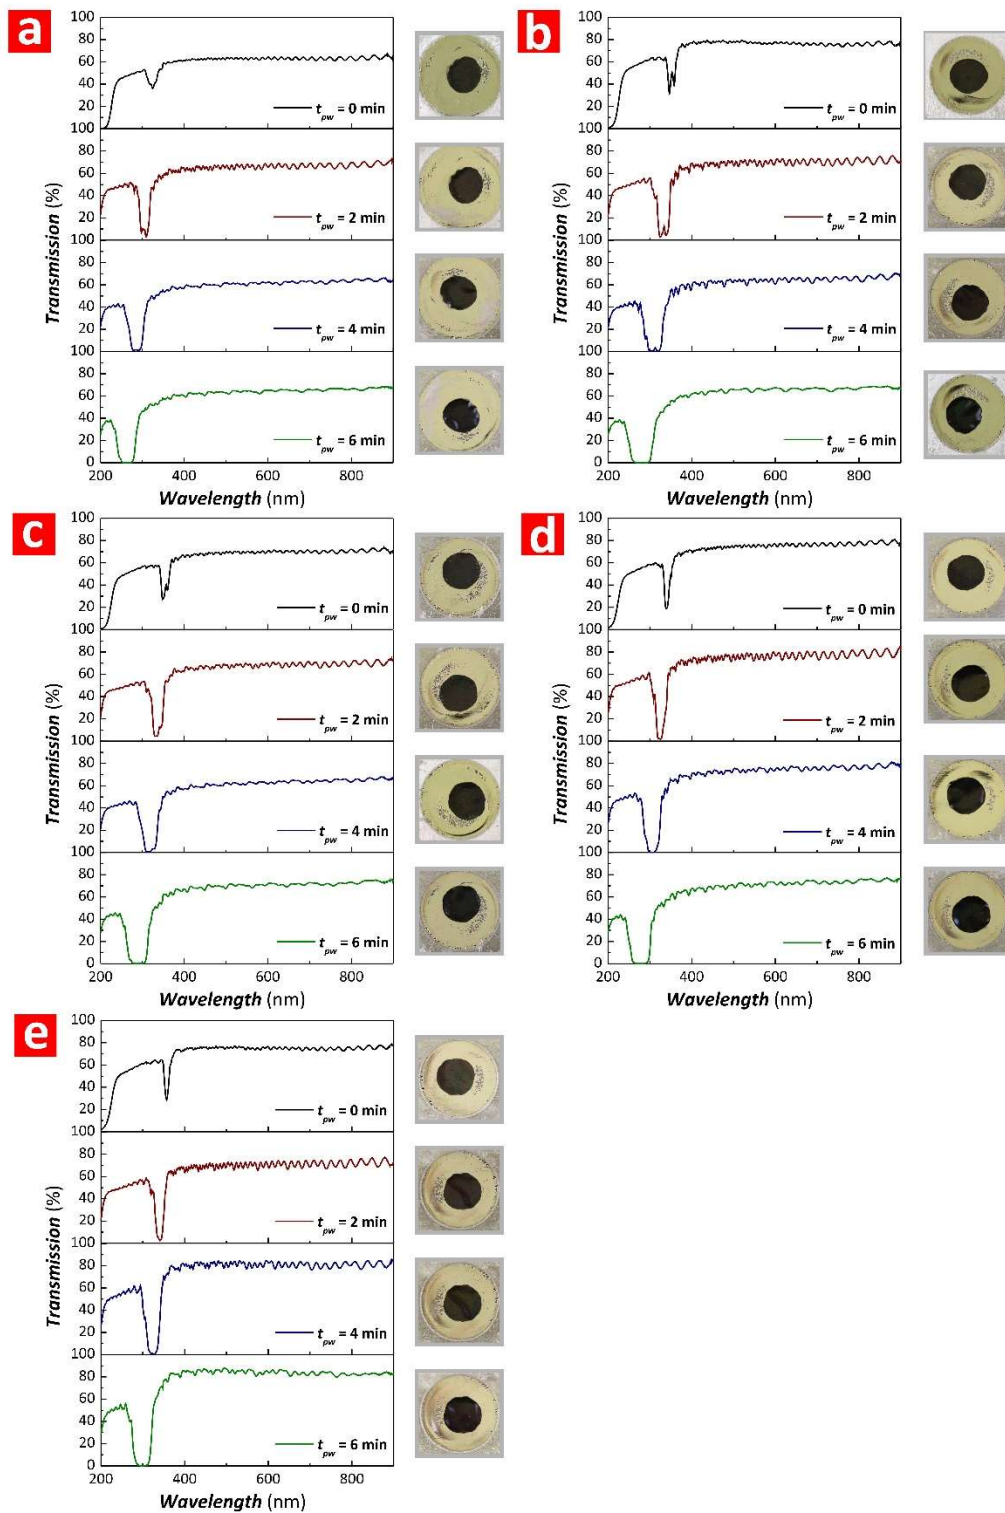

**Figure S12.** Representative transmission spectra for DBR-NAA- $\mu$ CVs produced by STPA at  $t_c = 7.5$  min and variable  $J_c$  and  $t_{pw}$  (note:  $T_P = 600$  s,  $A_J = 0.420$  mA cm $^{-2}$ ,  $J_{offset} = 0.280$  mA cm $^{-2}$ , and  $N_P = 30$  pulses). a)  $J_c = 0.210$  mA cm $^{-2}$ . b)  $J_c = 0.420$  mA cm $^{-2}$ . c)  $J_c = 0.315$  mA cm $^{-2}$ . d)  $J_c = 0.525$  mA cm $^{-2}$ . e)  $J_c = 0.630$  mA cm $^{-2}$ .

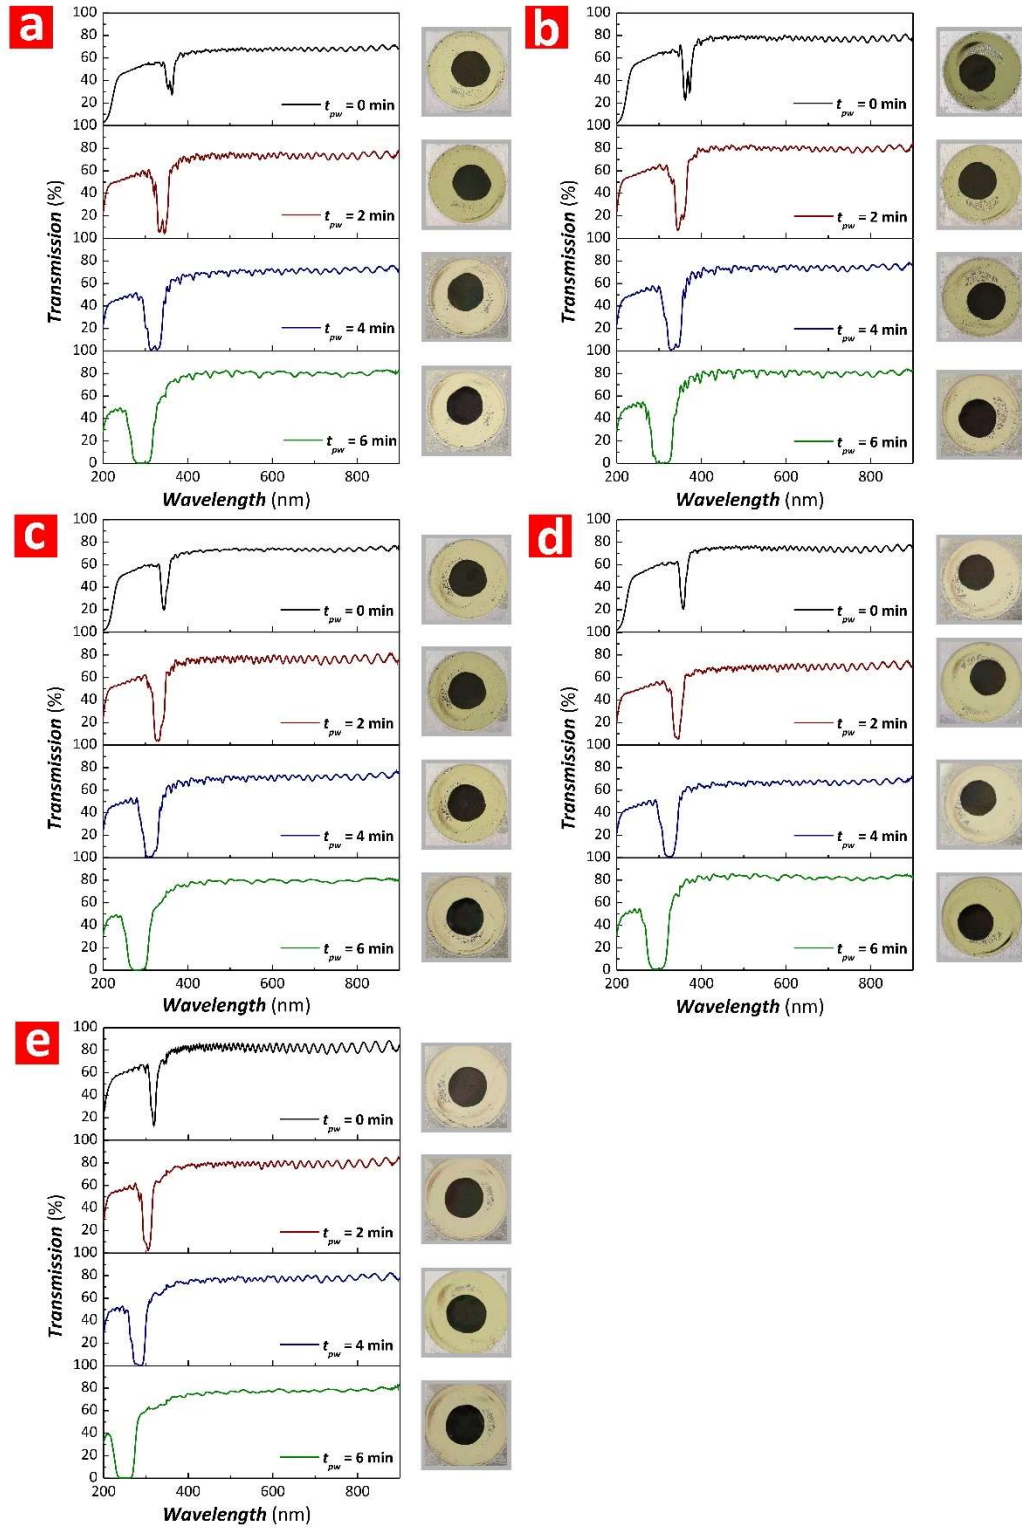

**Figure S13.** Representative transmission spectra for DBR-NAA- $\mu$ CVs produced by STPA at  $t_c = 8.5$  min and variable  $J_C$  and  $t_{pw}$  (note:  $T_P = 600$  s,  $A_J = 0.420$  mA cm $^{-2}$ ,  $J_{offset} = 0.280$  mA cm $^{-2}$ , and  $N_P = 30$  pulses). a)  $J_C = 0.210$  mA cm $^{-2}$ . b)  $J_C = 0.420$  mA cm $^{-2}$ . c)  $J_C = 0.315$  mA cm $^{-2}$ . d)  $J_C = 0.525$  mA cm $^{-2}$ . e)  $J_C = 0.630$  mA cm $^{-2}$ .



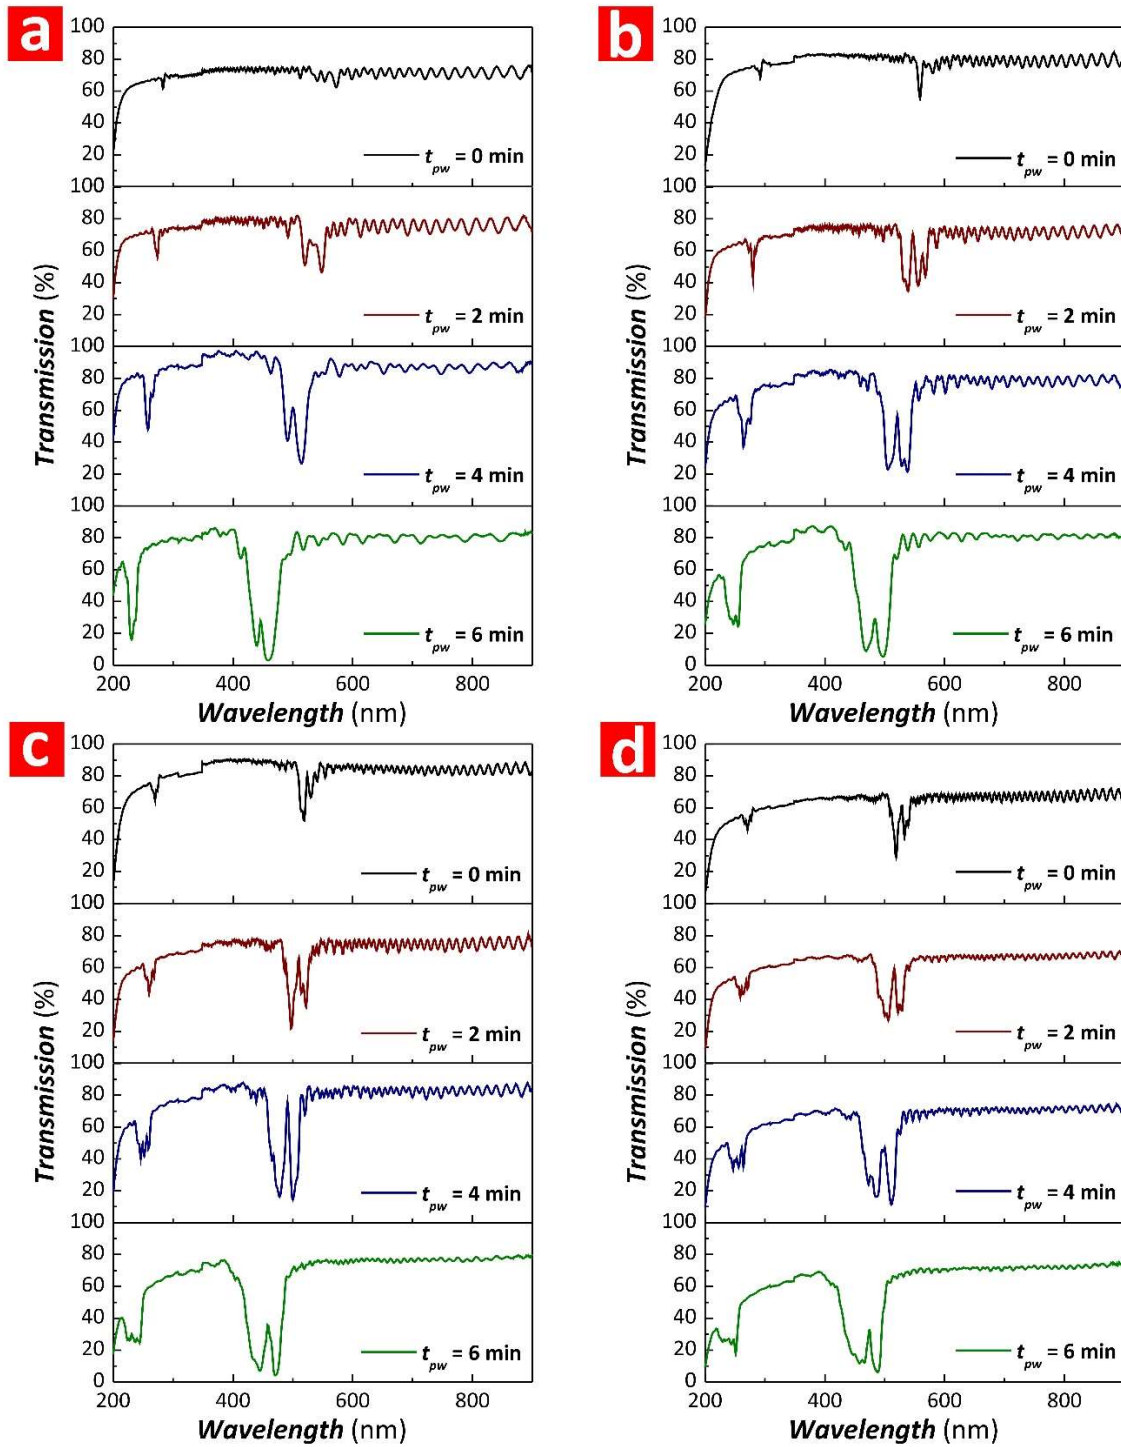

**Figure S14.** Representative transmission spectra for GIF-NAA- $\mu$ CVs produced by SPA with variable  $N_p$  (note:  $T_p = 600$  s,  $A_j = 0.420$  mA cm $^{-2}$ ,  $J_{offset} = 0.280$  mA cm $^{-2}$ ,  $t_c = 6.5$  min, and  $J_c = 0.420$  mA cm $^{-2}$ ). a)  $N_p = 20$  pulses. b)  $N_p = 30$  pulses. c)  $N_p = 40$  pulses. d)  $N_p = 50$  pulses.

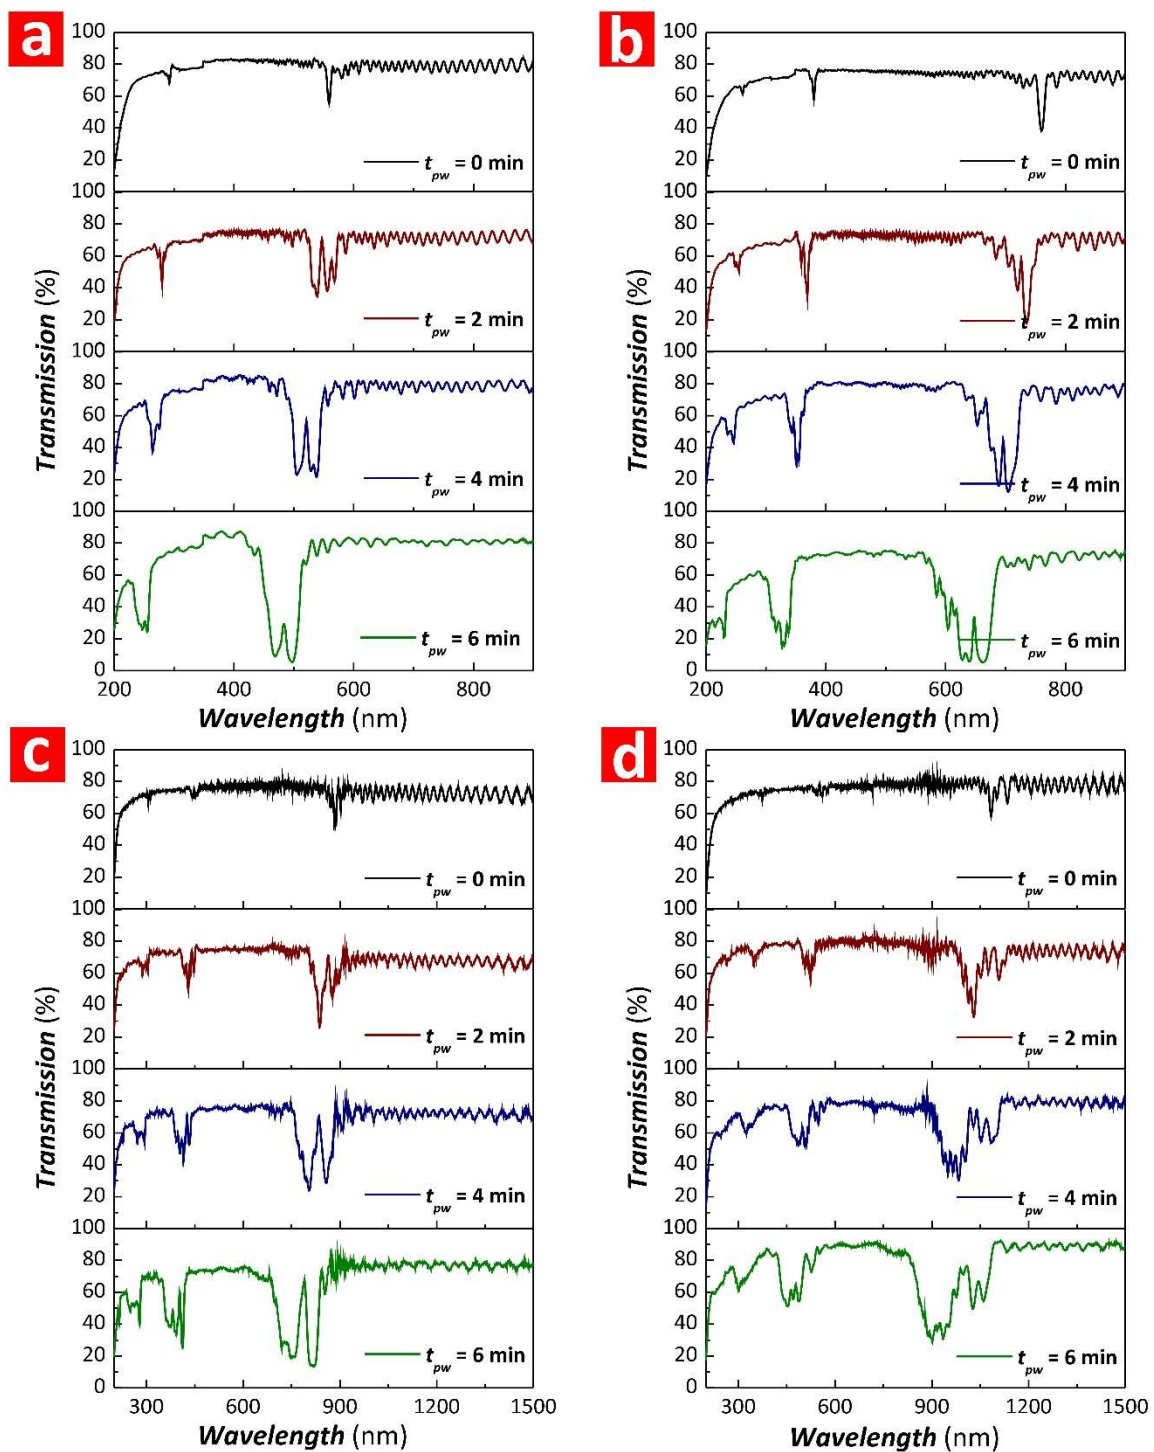

**Figure S15.** Representative transmission spectra for GIF-NAA- $\mu$ CVs produced by SPA with variable  $T_P$  (note:  $A_J = 0.420 \text{ mA cm}^{-2}$ ,  $J_{\text{offset}} = 0.280 \text{ mA cm}^{-2}$ ,  $N_P = 30$  pulses,  $t_C = 6.5$  min, and  $J_C = 0.420 \text{ mA cm}^{-2}$ ).  
 a)  $T_P = 600$  s. b)  $T_P = 800$  s. c)  $T_P = 1000$  s. d)  $T_P = 1200$  s.
